# Supplementary material for: DNA nanostructures from double-C-shaped motifs with controllable twist and curvature
Source: Royal Society of Chemistry journal article supplement (doi:10.1039/c9nr03861b), 2019-01-01
Supplement: c9nr03861b2.pdf [file c9nr03861b2.pdf]

## Supplementary Information 2

### DNA nanostructures from double-C-shaped motifs with controlled twist and curvature

Donglei Yang<sup>1,2,†</sup>, Kai Huang<sup>3,†</sup>, Pengfei Wang<sup>2</sup>, Yongli Mi<sup>1,4,\*</sup>, Bryan Wei<sup>3,\*</sup>

<sup>1</sup>School of Chemical Science and Engineering, Tongji University, Shanghai 200092, China

<sup>2</sup>Institute of Molecular Medicine (IMM), Renji Hospital, Shanghai Jiao Tong University School of Medicine, Shanghai 200127, China

<sup>3</sup>School of Life Sciences, Tsinghua University-Peking University Center for Life Sciences, Center for Synthetic and Systems Biology, Tsinghua University, Beijing 100084, China

<sup>4</sup>Department of Chemical and Biomolecular Engineering, the Hong Kong University of Science and Technology, Kowloon, Hong Kong SAR

<sup>†</sup>These authors contribute equally. \*Correspondence and requests for materials should be addressed to B.W. (email:bw@tsinghua.edu.cn) or Y. M. (email: keymix@ust.hk).

#### Table of contents

|                                                                               |   |
|-------------------------------------------------------------------------------|---|
| Strands of extended ribbon from motifs of 15-nt overlapping domain (R1) ..... | 2 |
| Strands of extended ribbon from motifs of 16-nt overlapping domain (R2) ..... | 2 |
| Strands of extended ribbon from motifs of 17-nt overlapping domain (R3) ..... | 2 |
| Strands of extended ribbon from motifs of 18-nt overlapping domain (R4) ..... | 3 |
| Strands of extended tube from motifs of 15-nt overlapping domain (T1) .....   | 3 |
| Strands of extended tube from motifs of 16-nt overlapping domain (T2) .....   | 3 |
| Strands of extended tube from motifs of 17-nt overlapping domain (T3) .....   | 3 |
| Strands of extended arches from repetitive trapezoid unit I (A1) .....        | 4 |
| Strands of extended arches from repetitive trapezoid unit II (A2) .....       | 4 |

**Strands of extended ribbon from motifs of 15-nt overlapping domain (R1)**

| seq_ID | Sequence                                            |
|--------|-----------------------------------------------------|
| 1      | TTTAAGATTTGAACACCCTCTCAATCTGCTCGGATTAAACATA         |
| 2      | TTTGGGTGTTCAAATCTTCCGAGCAGATTGAGAGATTCGGTAG         |
| 3      | GGTAATCACTTCGATTCAGCTATCTCCATCCTCACGTATACTACCGAATC  |
| 4      | GGACCATGCCAGATAGCTGAATCGATATACGTGAGGATGGTATGTTTAAT  |
| 5      | GGCATGGTCTCTTCTAATCGGAGCCCTGTTTCGCAGTAACGGTCTGCAAC  |
| 6      | AGTGATTACCGCTCCGATTAGAAGAGTTACTGCGAACAGGATCGGGCTTG  |
| 7      | CTGTGATAGAGTGCTCTTTAGCTCAACGTGGGTCAGCCCACAAGCCCGAT  |
| 8      | GACATAGACCTGAGCTAAAGAGCACTGGGCTGACCCACGTGTTGCAGACC  |
| 9      | GGTCTATGTCGCACTATCCCAGAGCGGCCGAAGCAATATGCCTAACCTTCT |
| 10     | TCTATCACAGGCTCTGGGATAGTGCCATATGCTTCGGCCATCGGCAATT   |
| 11     | TTTAGCAGGTTTAGATTATCGAATTTGCTACACAATTGCCGAT         |
| 12     | TTTTAATCTAAACCTGCTGTGTAGCAAATTCGAAGAAGTTAGG         |

**Strands of extended ribbon from motifs of 16-nt overlapping domain (R2)**

| seq_ID | Sequence                                              |
|--------|-------------------------------------------------------|
| 1      | TTTGCTCCAATGACCCAAAGGCAAGCGGTGCGTCGTAGGCGTCT          |
| 2      | TTTTTTGGGTCAATGGAGCGACGCACGCGCTTGCCCTCGAAAGCT         |
| 3      | ATTGAGTACCTTTATGGCTCGCTTCTGTTGCGCGAAATCAGGAGCTTTCGAG  |
| 4      | CATTAAAGCAAGAAGCGAGCCATAAACCTGATTTTCGCGCAACAGACGCCTAC |
| 5      | TGCTTTAATGATTAAGATGGATACTTCTAACTGCTTAACTCTTCGGTACATG  |
| 6      | GGTACTCAATAAGTATCCATCTTAATAGAGTTAAGCAGTTAGAGCTGTGTCT  |
| 7      | TTAAACGGACTCCTCGGAGACATACTGACTTTCATGGTAGCAGACACAGCT   |
| 8      | CACAAC TAGGGTATGTCTCCGAGGAGGTACCATGAAAGTCACATGTACCGA  |
| 9      | CCTAGTTGTGCCGAGAGGACACGCCGATAACAACCTCAAATCTTGTTTCT    |
| 10     | GTCCGTTTAAACGGCGTGTCTCTCGGTTTGAGGGTTGTTATGCCGGTTAGTC  |
| 11     | TTTTGGTTTCGGACATGCCAAATATAAGAAAGAGACGACTAACCGG        |
| 12     | TTTTGGCATGTCCGAACCAGTCTCTTTCTTATATTAGAAACAAGA         |

**Strands of extended ribbon from motifs of 17-nt overlapping domain (R3)**

| seq_ID | Sequence                                               |
|--------|--------------------------------------------------------|
| 1      | TTTTGCTTGGATCACGAAGCGATGCTTTCAAGCCCTGTAAAGGACGA        |
| 2      | TTTGCTTCGTGATCCAAGCACAGGGCTTGAAAGCATCGGAATGAAGC        |
| 3      | TCTTCAAAGTAGTAAACTTGTCATTTTCTACAGCTAGCTCGCTGGCTTCATTCC |
| 4      | TCCCTCAAGGAAATAGACAAGTTACTCAGCGACTAGCTGTAGATCGTCCTTTA  |
| 5      | CCTTGAGGGACTCCCGCGTGCAGACTTTCGGCCAAATACACGTATCGAACCCA  |
| 6      | ACTTTGAAGAACTGTGCGACGCGGGAGACGTGATTTGGCCGAAAGTGAACCTC  |
| 7      | TGGTTCATGGAATCCAGCCACTATTACAAAGCTACTGTTTCAGAGAGTTCCACT |
| 8      | CTACCCATTCTAATAGTGGCTGGATTTCTGAACAGTAGCTTTGTGGGTTTCGAT |
| 8      | GAATGGGTAGCGCCCGCATATCCGCACCATCGTATATGGTACTGATATTGACG  |
| 10     | CCATGAACCATGCGGATATGCCGGGCGAGTACCATATACGATGGATACCCTTCC |
| 11     | TTTGGTGTCAAACATTTACGGACCGGTGTTGACCACGGAAGGGTAT         |

|    |                                                 |
|----|-------------------------------------------------|
| 12 | TTTCGTAAATGTTTGACACCGTGGTCAACACCCGGTCCGTCAATATC |
|----|-------------------------------------------------|

**Strands of extended ribbon from motifs of 18-nt overlapping domain (R4)**

| seq_ID | Sequence                                                   |
|--------|------------------------------------------------------------|
| 1      | TTTCGCCGAACGTGTCACTCACAAGCGCCTCGGGCCAGTACACCGGGTT          |
| 2      | TTTTGAGTGACACGTTTCGGCGACTGGCCCGAGGCGCTTGAGCTATCATA         |
| 3      | AAACCTGAATTTACCACAAAGTCAGTTAGGAAAGGTGTGGAAGGATATGATAGCT    |
| 4      | ATTTGCACTTAACTGACTTTGTGGTAAATCCTTCCACACCTTTCCTAACCCGGTGT   |
| 5      | AAGTGCAAATCTGTAGGATGACCTGTACTGAGTCCGTGGCCTTGGAGGCATCTAAC   |
| 6      | TTCAGGGTTTGTACAGGTCATCCTACAGTCCAAGGCCACGGACTCAGGTGGAGCTT   |
| 7      | TACTAAGCAGAACTGTTTCATGGTGTTCGGAGAGCGATTGGCCGACGCAAGCTCCACC |
| 8      | GCGACCCACCCGACACCATGAACAGTTGCGTCGGCCAATCGCTCTGTTAGATGCC    |
| 9      | GTGGGTGCGCTGCTAACGATTTCTCAGAAAGCCCTTAAATAGATTAGTCACGCCAA   |
| 10     | CTGCTTAGTATCTGAGAAATCGTTAGCATAATCTATTTAAGGGCTTGGGTCAACGA   |
| 11     | TTTCGACCGAGCTGCAGAGGGTATGAGTTTCGCTGTGTGCTTGACCC            |
| 12     | TTTCCTCTGACAGCTCGGTGCGAACAGCGAAACTCATACTTGGCGTGAC          |

**Strands of extended tube from motifs of 15-nt overlapping domain (T1)**

| seq_ID | Sequence                                            |
|--------|-----------------------------------------------------|
| 1      | TGGGCCAAGTTTACTTATTCTATTGTGGCTACCGTGTAAATACCTGGGT   |
| 2      | CCAACATATCAATAGATAAGTAATTAACACGGTAGCCATGTCGTCGAT    |
| 3      | ATATAGTTGGGAGGTGTCCTTAAAGTGCATTGGTTCACATAATCGACGACA |
| 4      | ACTTGGCCCACTTTAAGGACACCTCTAGTGAACCAATGCAACCCAGGGTA  |

**Strands of extended tube from motifs of 16-nt overlapping domain (T2)**

| seq_ID | Sequence                                              |
|--------|-------------------------------------------------------|
| 1      | CCGATGGGCCCTTCACTTAGTGTGCTGGAGCTTATACCAGTGGTCTGATGCCG |
| 2      | GGGACCGGCGCACGACACTAAGTGAACCACTGGTATAAGCTCTAGGCAGTAT  |
| 3      | GGCCCATCGGACGCCCTACCCACAGCTATTGCGTTCGGTTGGCGGCATCAGA  |
| 4      | CGCCGGTCCCCTGTGGGTAGGGCGTCCAACCGAACGCAATAATACTGCCTA   |

**Strands of extended tube from motifs of 17-nt overlapping domain (T3)**

| seq_ID | Sequence                                                |
|--------|---------------------------------------------------------|
| 1      | GTCTAACGAATATGATCCCAATGAGTTTGCCTTCTTTAGCAGACTACGTTGAGA  |
| 2      | GAGGACCTGCAACTCATTTGGGATCATAGTCTGCTAAAGAAGGCAATCACTGGTG |
| 3      | GCAGTCTCGGGTCATGGGCTCTGTGCATACACATTCTTACCCACCAGTGAT     |
| 4      | TTCGTTAGACCACAGAGCCCATGACCCGGTAAGGAATGTGTATGTCTCAACGTA  |

**Strands of extended arches from repetitive trapezoid unit I (A1)**

| seq_ID | Sequence                                                 |
|--------|----------------------------------------------------------|
| 1      | TGAGACGTGTGGCTGAACGGGCACTCAAACATAACGGCCCTCAGCTGATGTCAG   |
| 2      | TACGTCAGCATGAGTGCCCGTTCAGCCCTGAGGGCCGTTTAGTTGTCATCTGCC   |
| 3      | GTCCATCCCTGGTAGTATCAGTGTATTATTTAGACAAGAATGTCTCGGCAGATGAC |
| 4      | TCGGCGACTCATAACACTGATACTACCGAGACATTCTTGTCTAACTGACATCAG   |
| 5      | GAGTCGCCGACACGCGAGCCAAGGCGTCTAGCCATTATAGCGCCTCTCGCCA     |
| 6      | AGGGATGGACCGCCTTGGCTCGCGTGCCTATAATGGCTAGAAAAGGACATAC     |
| 7      | GGGCGATTATTGAACCCAAACAGGATCGCAGTGATGCTAAGTGTATGTCCCTT    |
| 8      | CAGAGAGCGCATCCTGTTTGGGTTCAACTTAGCATCACTGCGTGGCGAGAGG     |
| 9      | GCGCTCTCTGGAGGTGTTTCGCGCCCTATGACTTTCAAAGGGCTTCCGACC      |
| 10     | ATAATCGCCCGGGCGCAACACCTCCCTTTGAAAGTCATAGGTATCCGAT        |
| 11     | TTGGAGTGTGCACTTCCCTGACTACAGGGTTGATGATGGGCATCGGATACC      |
| 12     | CTCCGTCTGCTGTAGTCAGGAAGTGGCCCATCATCAACCCGGTCGGAAGC       |
| 13     | CACACTCCAATAAGGTAGCCGGAT                                 |
| 14     | GCAGACGGAGATCCGGCTACCTTA                                 |
| 15     | TGCTGACGTATTCCCTATATGGTTGGTCA                            |
| 16     | ACACGTCTCATGACCAACCATATAGGAA                             |

**Strands of extended arches from repetitive trapezoid unit II (A2)**

| seq_ID | Sequence                                                 |
|--------|----------------------------------------------------------|
| 1      | CCGAGCCGAAGGACATTTACCATTTGTGA                            |
| 2      | CTCAGTTCCCTCACAATGGTAAATGTCC                             |
| 3      | TTCGGCTCGGCGGGCGCTAGTGAATCATATTTAGTATATTATTTGGCCGCTCGAAA |
| 4      | GGGAACTGAGATGATTCACTAGCGCCCGCCAAATAATATACTAAATCCCGTCAGCT |
| 5      | AGATATAGAGTCGGGTTAGGGAGTAGCGTCTGACACTGGACCGTAGCTGACGGG   |
| 6      | TCTCGCTGCGGCTACTCCCTAACCCGAACGGTCCAGTGTGAGACTTTTCGAGCGG  |
| 7      | CGCAGCGAGACCTATCGTCATCACCGAATTGACGCATTTCCATTGTTCGGCCT    |
| 8      | CTCTATATCTCGGTGATGACGATAGGTGGAAATGCGTCAATTGTATGTCACG     |
| 9      | CGCTTAAACGCGACGGCTGATCGCCGATTTGCTAATAAAGCGTGACATAC       |
| 10     | CTATTACACCGGCGATCAGCCGTCGCTTTATTAGCAAATCAGGCCGACAA       |
| 11     | CGTTTAAAGCGAAGAGCATACGCTC                                |
| 12     | GGTGTAAATAGGAGCGTATGCTCTT                                |
